# Supplementary material for: Experimental Evolution of Mycobacterium tuberculosis in Human Macrophages Results in Low-Frequency Mutations Not Associated with Selective Advantage
Source: PubMed Central journal article supplement (PMC5154527; doi:10.1371/journal.pone.0167989), 2016-12-13
Supplement: pone.0167989.s001.pdf [file pone.0167989.s001.pdf]

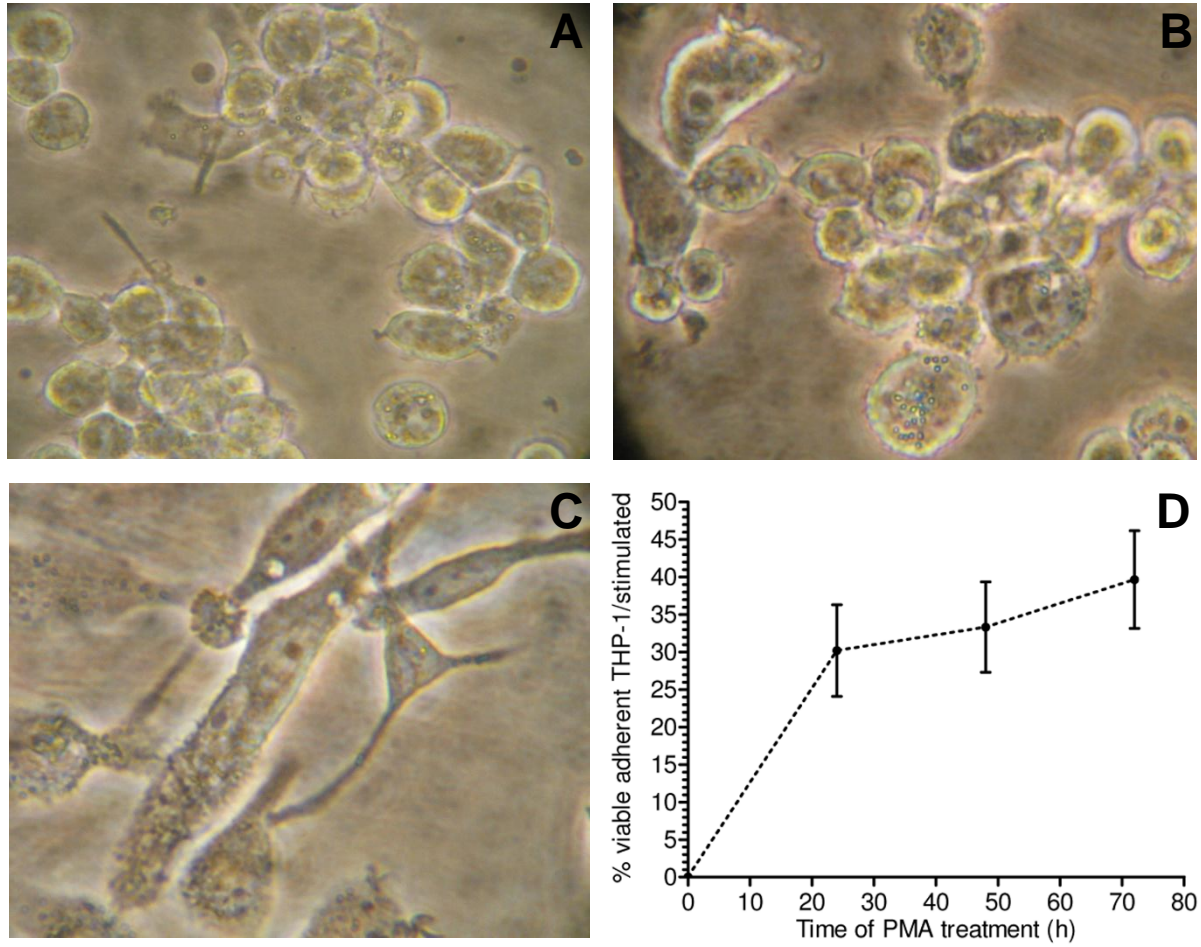

**S1 Fig. Morphology and adhesion propriety of THP-1 cells upon PMA stimulation.**
