# Supplementary material for: Experimental Evolution of Mycobacterium tuberculosis in Human Macrophages Results in Low-Frequency Mutations Not Associated with Selective Advantage
Source: PubMed Central journal article supplement (PMC5154527; doi:10.1371/journal.pone.0167989), 2016-12-13
Supplement: pone.0167989.s002.pdf [file pone.0167989.s002.pdf]

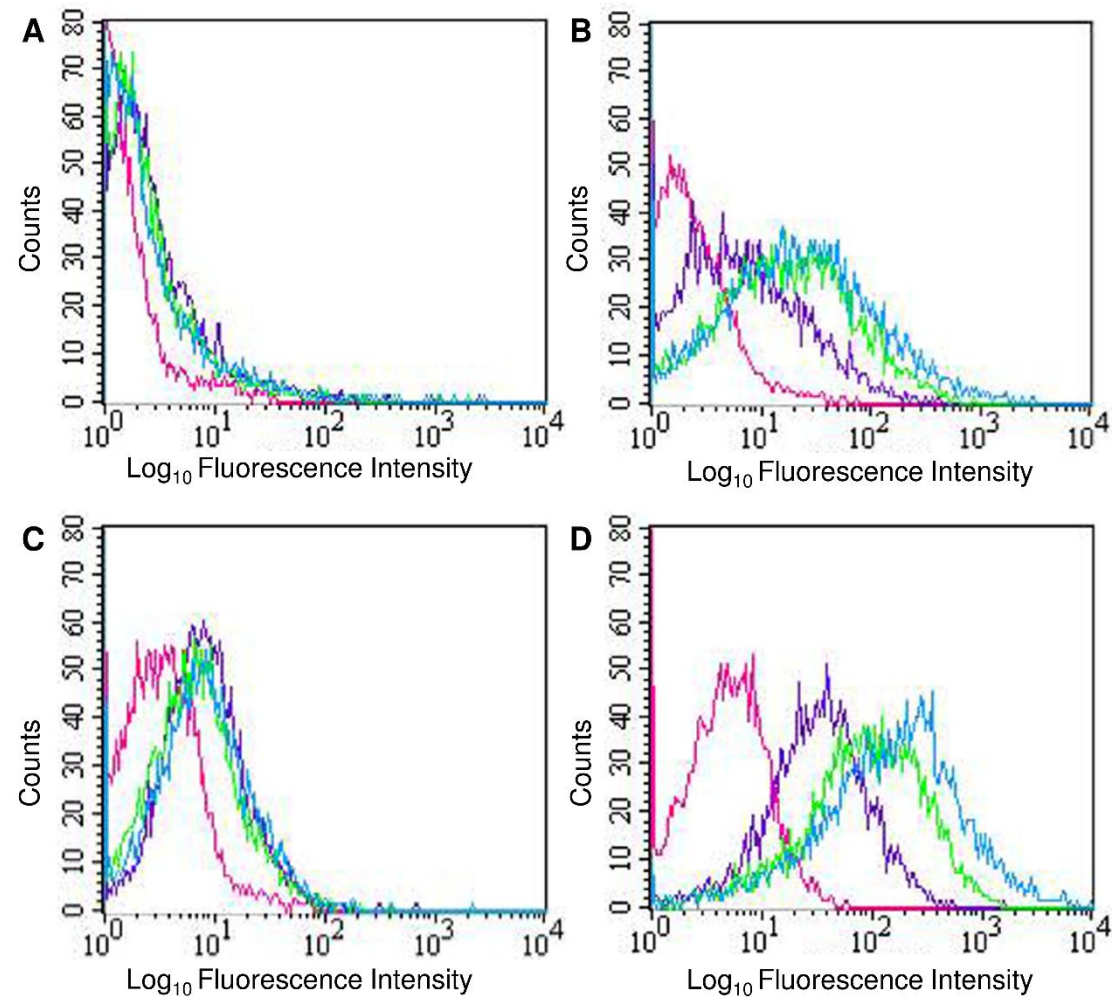

**S2 Fig. Time course of surface marker expression in THP-1 stimulated with PMA.**
