# Supplementary material for: Experimental Evolution of Mycobacterium tuberculosis in Human Macrophages Results in Low-Frequency Mutations Not Associated with Selective Advantage
Source: PubMed Central journal article supplement (PMC5154527; doi:10.1371/journal.pone.0167989), 2016-12-13
Supplement: pone.0167989.s003.pdf [file pone.0167989.s003.pdf]

**S1 Table. Oligonucleotides used in PCR and Sanger sequencing**

| <b>Target</b>                 | <b>Primer name</b> | <b>Oligonucleotide sequence (5'-3')</b> |
|-------------------------------|--------------------|-----------------------------------------|
| <i>celA2b</i> (3' non coding) | Rv41               | GTTCTCGGCGAAAGTCAACTA                   |
|                               | Rv42               | ACCCGATGTTCAAGCAAGCG                    |
| <i>plcA</i>                   | Rv47               | CGGAATGTCACGTCGAGAGTTT                  |
|                               | Rv48               | CCCATTGGTGCTGGAAAGCGTT                  |
| <i>papA2</i>                  | Rv49               | ACGAGCAACAGGGCGAGCGATT                  |
|                               | Rv50               | CGTTCTGAGTTCTGTCGGCGTCCTA               |
| <i>cut3</i>                   | Rv55               | GCGGACACATCGACGG                        |
|                               | Rv56               | GCATCTGAAGGACAGACC                      |
