# Supplementary material for: Experimental Evolution of Mycobacterium tuberculosis in Human Macrophages Results in Low-Frequency Mutations Not Associated with Selective Advantage
Source: PubMed Central journal article supplement (PMC5154527; doi:10.1371/journal.pone.0167989), 2016-12-13
Supplement: pone.0167989.s004.pdf [file pone.0167989.s004.pdf]

**S2 Table. Oligonucleotides and restriction enzymes used to obtain PlcA recombinant proteins**

| <b>Oligonucleotide sequence (5'-3')<sup>a</sup></b> | <b>Restriction enzyme</b> |
|-----------------------------------------------------|---------------------------|
| CATGGCGT <u>CATGAACTCACGTCGAGAGTTTTGACAAAGC</u>     | BspHI                     |
| CATGGCGA <u>AAGCTTGGCTGCACAGCCCGCTGGG</u>           | HindIII                   |

<sup>a</sup> Restriction site sequences are underlined
